# Supplementary material for: Canine circovirus and Canine adenovirus type 1 and 2 in dogs with parvoviral enteritis
Source: Springer Nature journal article supplement (doi:10.1007/s11259-021-09850-y), 2021-10-20
Supplement: MOESM1 [file 11259_2021_9850_MOESM1_ESM.pdf]

**Veterinary Research Communications**

**Canine circovirus and Canine adenovirus type 1 and 2 in dogs with parvoviral enteritis**

Andrea Balboni, Alessia Terrusi, Lorenza Urbani, Roberta Troia, Silvia A M Stefanelli, Massimo Giunti, Mara Battilani\*.

\* Corresponding author:

Mara Battilani

Department of Veterinary Medical Sciences, *Alma Mater Studiorum* – University of Bologna, Ozzano dell'Emilia (BO), Italy

*E-mail address:* [mara.battilani@unibo.it](mailto:mara.battilani@unibo.it)

**Online Resource 1** Canine circovirus sequences obtained in this study and reference strains used for sequence analysis

| <b>Virus</b> | <b>Host</b> | <b>Sample</b> | <b>Year<sup>a</sup></b> | <b>Origin</b> | <b>GenBank ID</b> | <b>Genome size (nt)</b> | <b>I</b> | <b>D</b> | <b>P</b> |
|--------------|-------------|---------------|-------------------------|---------------|-------------------|-------------------------|----------|----------|----------|
| 102          | NA          | NA            | 2017                    | China         | MG279118          | 2063                    |          |          |          |
| 176          | NA          | NA            | 2017                    | China         | MG279122          | 2063                    |          |          |          |
| 177          | NA          | NA            | 2017                    | China         | MG279130          | 2063                    |          |          |          |
| 178          | NA          | NA            | 2017                    | China         | MG279129          | 2063                    |          |          |          |
| 179          | NA          | NA            | 2017                    | China         | MG279128          | 2063                    |          |          |          |
| 180          | NA          | NA            | 2017                    | China         | MG279127          | 2063                    |          |          |          |
| 181          | NA          | NA            | 2017                    | China         | MG279126          | 2063                    |          |          |          |
| 182          | NA          | NA            | 2017                    | China         | MG279125          | 2063                    |          |          |          |
| 183          | NA          | NA            | 2017                    | China         | MG279124          | 2063                    |          |          |          |
| 185          | NA          | NA            | 2017                    | China         | MG279123          | 2063                    |          |          |          |
| 186          | NA          | NA            | 2017                    | China         | MG279121          | 2063                    |          |          |          |
| 198          | NA          | NA            | 2017                    | China         | MG279120          | 2063                    |          |          |          |
| 199          | NA          | NA            | 2017                    | China         | MG279119          | 2063                    |          |          |          |
| 201          | NA          | NA            | 2017                    | China         | MG279135          | 2063                    |          |          |          |
| 202          | NA          | NA            | 2017                    | China         | MG279131          | 2063                    |          |          |          |
| 204          | NA          | NA            | 2017                    | China         | MG279141          | 2063                    |          |          |          |
| 205          | NA          | NA            | 2017                    | China         | MG279140          | 2063                    |          |          |          |
| 214          | dog         | serum         | 2011                    | USA           | JQ821392          | 2063                    |          |          |          |
| 384          | NA          | NA            | 2017                    | China         | MG279139          | 2064                    |          |          |          |
| 388          | NA          | NA            | 2017                    | China         | MG279138          | 2064                    |          |          |          |
| 390          | NA          | NA            | 2017                    | China         | MG279137          | 2064                    |          |          |          |
| 391          | NA          | NA            | 2017                    | China         | MG279136          | 2064                    |          |          |          |
| 394          | NA          | NA            | 2017                    | China         | MG279134          | 2064                    |          |          |          |
| 395          | NA          | NA            | 2017                    | China         | MG279133          | 2064                    |          |          |          |
| 398          | NA          | NA            | 2017                    | China         | MG279132          | 2064                    |          |          |          |
| 01/2015      | red fox     | spleen        | 2015                    | Norway        | MT180077          | 2063                    |          |          |          |
| 19/2014      | red fox     | spleen        | 2014                    | Norway        | MT180078          | 2063                    |          |          |          |
| 27/2014      | red fox     | spleen        | 2014                    | Norway        | MT180079          | 2063                    |          |          |          |
| 64/2017      | red fox     | liver         | 2017                    | Norway        | MT180080          | 2063                    |          |          |          |
| 73/2017      | red fox     | spleen        | 2017                    | Norway        | MT180081          | 2063                    |          |          |          |
| 77/2017      | red fox     | spleen        | 2017                    | Norway        | MT180082          | 2063                    |          |          |          |
| 02/1996      | arctic fox  | liver         | 1996                    | Norway        | MT180083          | 2063                    |          |          |          |
| 47/1997      | arctic fox  | spleen        | 1997                    | Norway        | MT180084          | 2063                    |          |          |          |
| 52/1999      | arctic fox  | spleen        | 1999                    | Norway        | MT180085          | 2063                    |          |          |          |
| 55/1998      | arctic fox  | spleen        | 1998                    | Norway        | MT180086          | 2063                    |          |          |          |
| 57/1997      | arctic fox  | spleen        | 1997                    | Norway        | MT180087          | 2063                    |          |          |          |
| 65/1999      | arctic fox  | liver         | 1999                    | Norway        | MT180088          | 2063                    |          |          |          |
| 70/1997      | arctic fox  | liver         | 1997                    | Norway        | MT180089          | 2063                    |          |          |          |

|                |            |            |      |          |          |                |
|----------------|------------|------------|------|----------|----------|----------------|
| 79/1997        | arctic fox | liver      | 1997 | Norway   | MT180090 | 2063           |
| 55590          | red fox    | faeces     | 2014 | Croatia  | KP941114 | 2055 (partial) |
| 09-10F/2011    | red fox    | faeces     | 2011 | Italy    | MH454599 | 2001 (partial) |
| 14P105D/TH2016 | dog        | lung       | 2014 | Thailand | MG737378 | 2039 (partial) |
| 14P112N/TH2016 | dog        | lung       | 2016 | Thailand | MG737386 | 1989 (partial) |
| 15P061D/TH2016 | dog        | lung       | 2015 | Thailand | MG737379 | 1911 (partial) |
| AZ2972-13      | dog        | intestine  | 2013 | Italy    | KT734813 | 2063           |
| AZ4133/1-13    | wolf       | spleen     | 2013 | Italy    | KT734815 | 2063           |
| AZ4133/2-13    | wolf       | intestine  | 2013 | Italy    | KT734827 | 2063           |
| AZ4438-13      | badger     | intestine  | 2013 | Italy    | KT734816 | 2063           |
| AZ5212/1-14    | dog        | liver      | 2014 | Italy    | KT734817 | 2063           |
| AZ5212/2-14    | dog        | lung       | 2014 | Italy    | KT734818 | 2063           |
| AZ5586-13      | wolf       | lung       | 2013 | Italy    | KT734819 | 2063           |
| AZ663/1-13     | wolf       | spleen     | 2013 | Italy    | KT734820 | 2063           |
| AZ663/2-13     | wolf       | intestine  | 2013 | Italy    | KT734824 | 2063           |
| Bari/411-13    | dog        | intestine  | 2013 | Italy    | KJ530972 | 2063           |
| C24            | dog        | faeces     | 2016 | China    | MK731981 | 2063           |
| C79            | dog        | faeces     | 2016 | China    | MK944079 | 2063           |
| C85            | dog        | faeces     | 2016 | China    | MK944080 | 2063           |
| CB6293/1-14    | wolf       | mln        | 2014 | Italy    | KT734812 | 2063           |
| CB6293/2-14    | wolf       | intestine  | 2014 | Italy    | KT734828 | 2063           |
| CD17/2016      | dog        | faeces     | 2016 | China    | MG266899 | 2063           |
| CP134/TH2016   | dog        | nasal swab | 2016 | Thailand | MG737381 | 1902 (partial) |
| CP144/TH2016   | dog        | nasal swab | 2016 | Thailand | MG737382 | 1905 (partial) |
| CP181/TH2016   | dog        | nasal swab | 2016 | Thailand | MG737383 | 1907 (partial) |
| CP188/TH2016   | dog        | nasal swab | 2016 | Thailand | MG737384 | 1903 (partial) |
| CP191/TH2016   | dog        | nasal swab | 2016 | Thailand | MG737385 | 1954 (partial) |
| CP28/TH2016    | dog        | nasal swab | 2016 | Thailand | MG737380 | 1907 (partial) |
| FUBerlin-JRS   | dog        | spleen     | 2014 | Germany  | KT283604 | 2063           |
| GL33           | dog        | serum      | 2015 | China    | KY388480 | 2063           |
| GL51           | dog        | serum      | 2015 | China    | KY388482 | 2063           |
| Ha13           | dog        | blood      | 2013 | Germany  | KF887949 | 2063           |
| JZ50           | dog        | serum      | 2014 | China    | KY388481 | 2063           |
| JZ82           | dog        | serum      | 2014 | China    | KY388490 | 2063           |
| JZ85           | dog        | serum      | 2014 | China    | KY388489 | 2063           |
| JZ98/2014      | dog        | serum      | 2014 | China    | KT946839 | 2063           |
| K1             | dog        | faeces     | 2016 | China    | MK731982 | 2063           |
| LA128          | dog        | serum      | 2014 | China    | KY388488 | 2063           |
| LA237          | dog        | serum      | 2014 | China    | KY388487 | 2064           |
| LA280          | dog        | serum      | 2014 | China    | KY388486 | 2063           |
| NC21           | dog        | NA         | 2018 | China    | MN128702 | 2063           |

|                  |            |               |             |                |                     |             |
|------------------|------------|---------------|-------------|----------------|---------------------|-------------|
| OH19098-1        | dog        | spleen        | 2015        | USA            | MF457592            | 2063        |
| PE8575/1-13      | dog        | mln           | 2013        | Italy          | KT734823            | 2063        |
| PE8575/2-13      | dog        | intestine     | 2013        | Italy          | KT734826            | 2063        |
| TE4016-13        | wolf       | spleen        | 2013        | Italy          | KT734814            | 2063        |
| TE6685/1-13      | dog        | brain         | 2013        | Italy          | KT734821            | 2063        |
| TE6685/2-13      | dog        | lung          | 2013        | Italy          | KT734825            | 2063        |
| TE7482-13        | wolf       | intestine     | 2013        | Italy          | KT734822            | 2063        |
| UBA-Baires       | dog        | lymph node    | 2016        | Argentina      | MK033608            | 2063        |
| UCD1-1698        | dog        | liver         | 2011        | USA            | KC241982 (NC020904) | 2063        |
| UCD2-32162       | dog        | faeces        | 2011        | USA            | KC241984            | 2063        |
| UCD3-478         | dog        | blood         | 2011        | USA            | KC241983            | 2063        |
| VS7100001        | red fox    | serum         | 2013        | United Kingdom | KP260925            | 2063        |
| VS7100003        | red fox    | serum         | 2013        | United Kingdom | KP260926            | 2063        |
| VS7100005        | red fox    | serum         | 2013        | United Kingdom | KP260927            | 2063        |
| WM46             | dog        | serum         | 2015        | China          | KY388485            | 2064        |
| WM48             | dog        | serum         | 2015        | China          | KY388484            | 2064        |
| WM60             | dog        | serum         | 2015        | China          | KY388483            | 2064        |
| WM62             | dog        | serum         | 2015        | China          | KY388493            | 2064        |
| WM63             | dog        | serum         | 2015        | China          | KY388491            | 2064        |
| WM66             | dog        | serum         | 2015        | China          | KY388492            | 2064        |
| WM72             | dog        | serum         | 2015        | China          | KY388503            | 2064        |
| WM74             | dog        | serum         | 2015        | China          | KY388502            | 2064        |
| WM76             | dog        | serum         | 2015        | China          | KY388501            | 2064        |
| WM77             | dog        | serum         | 2015        | China          | KY388500            | 2064        |
| WM79             | dog        | serum         | 2015        | China          | KY388499            | 2064        |
| WM83             | dog        | serum         | 2015        | China          | KY388498            | 2063        |
| WM84             | dog        | serum         | 2015        | China          | KY388497            | 2064        |
| XF16             | dog        | faeces        | 2016        | China          | MF797786            | 2063        |
| XXT242           | dog        | serum         | 2015        | China          | KY388496            | 2063        |
| XXT243           | dog        | serum         | 2015        | China          | KY388495            | 2063        |
| YL11             | dog        | serum         | 2016        | China          | KY388494            | 2063        |
| <b>800/2009</b>  | <b>dog</b> | <b>faeces</b> | <b>2009</b> | <b>Italy</b>   | <b>MT193159</b>     | <b>2063</b> |
| <b>115/2010</b>  | <b>dog</b> | <b>faeces</b> | <b>2010</b> | <b>Italy</b>   | <b>MT193160</b>     | <b>2063</b> |
| <b>121/2010</b>  | <b>dog</b> | <b>faeces</b> | <b>2010</b> | <b>Italy</b>   | <b>MT193161</b>     | <b>2063</b> |
| <b>540/2010</b>  | <b>dog</b> | <b>faeces</b> | <b>2010</b> | <b>Italy</b>   | <b>MT193162</b>     | <b>2063</b> |
| <b>570/2013</b>  | <b>dog</b> | <b>faeces</b> | <b>2013</b> | <b>Italy</b>   | <b>MT193163</b>     | <b>2063</b> |
| <b>608/2014</b>  | <b>dog</b> | <b>faeces</b> | <b>2014</b> | <b>Italy</b>   | <b>MT193164</b>     | <b>2063</b> |
| <b>1203/2016</b> | <b>dog</b> | <b>faeces</b> | <b>2016</b> | <b>Italy</b>   | <b>MT193165</b>     | <b>2063</b> |
| <b>1367/2016</b> | <b>dog</b> | <b>faeces</b> | <b>2016</b> | <b>Italy</b>   | <b>MT193166</b>     | <b>2063</b> |

<sup>a</sup> Year of virus identification or sequence submission to the GenBank database

NA, not available; mln, mesenteric lymph node; nt, nucleotide; I, sequences used to calculate the nucleotide identity; D, sequences used for entropy (H(x)) plot and DnaSP analysis; P, sequences used for phylogenetic analysis. In bold: CanineCV nucleotide sequences obtained in this study.
