# Supplementary material for: Canine circovirus and Canine adenovirus type 1 and 2 in dogs with parvoviral enteritis
Source: Springer Nature journal article supplement (doi:10.1007/s11259-021-09850-y), 2021-10-20
Supplement: MOESM2 [file 11259_2021_9850_MOESM2_ESM.pdf]

**Veterinary Research Communications**

**Canine circovirus and Canine adenovirus type 1 and 2 in dogs with parvoviral enteritis**

Andrea Balboni, Alessia Terrusi, Lorenza Urbani, Roberta Troia, Silvia A M Stefanelli, Massimo Giunti, Mara Battilani\*.

\* Corresponding author:

Mara Battilani

Department of Veterinary Medical Sciences, *Alma Mater Studiorum* – University of Bologna, Ozzano dell'Emilia (BO), Italy

*E-mail address:* [mara.battilani@unibo.it](mailto:mara.battilani@unibo.it)

**Online Resource 2** Canine adenovirus sequences obtained in this study and reference strains used for sequence analysis

| <b>Virus</b>                     | <b>Host</b> | <b>Sample</b> | <b>Year<sup>a</sup></b> | <b>Origin</b> | <b>GenBank ID</b>             | <b>E</b> | <b>H</b> | <b>F</b> | <b>D</b> | <b>P</b> |
|----------------------------------|-------------|---------------|-------------------------|---------------|-------------------------------|----------|----------|----------|----------|----------|
| CAAdV-1 field strain B579        | dog         | liver         | 2009                    | IN            | GQ340423                      |          |          |          |          |          |
| CAAdV-1 field strain             | dog         | iccf          | 2006 <sup>b</sup>       | IN            | EF057101                      |          |          |          |          |          |
| CAAdV-1 field strain Utrecht     | dog         | NA            | 1992 <sup>b</sup>       | NL            | S38238                        |          |          |          |          |          |
| CAAdV-1 field strain 384-FFPEL   | dog         | ffpel         | 1966                    | IT            | KP670422                      |          |          |          |          |          |
| CAAdV-1 field strain 300-RS      | dog         | rs            | 2012                    | IT            | KF676980                      |          |          |          |          |          |
| CAAdV-1 field strain 313-Lparaf. | dog         | ffpel         | 2010                    | IT            | KF676977                      |          |          |          |          |          |
| CAAdV-1 field strain 09-13F      | red fox     | faeces        | 2011                    | IT            | JX416838                      |          |          |          |          |          |
| CAAdV-1 field strain 300115/3    | red fox     | kidney        | 2015                    | UK            | KU755710                      |          |          |          |          |          |
| CAAdV-1 field strain 300115/2    | red fox     | liver         | 2015                    | UK            | KU755711                      |          |          |          |          |          |
| CAAdV-1 field strain 220515/1    | red fox     | liver         | 2015                    | UK            | KU755712                      |          |          |          |          |          |
| CAAdV-1 field strain 201114/2    | red fox     | liver         | 2014                    | UK            | KU755713                      |          |          |          |          |          |
| CAAdV-1 field strain 201114/1    | red fox     | liver         | 2015                    | UK            | KU755714                      |          |          |          |          |          |
| CAAdV-1 field strain 111114/1    | red fox     | liver         | 2014                    | UK            | KU755715                      |          |          |          |          |          |
| CAAdV-1 field strain 090315/2    | red fox     | liver         | 2015                    | UK            | KU755716                      |          |          |          |          |          |
| CAAdV-1 field strain 090315/1    | red fox     | liver         | 2015                    | UK            | KU755717                      |          |          |          |          |          |
| CAAdV-1 field strain 061014/2    | red fox     | liver         | 2014                    | UK            | KU755718                      |          |          |          |          |          |
| CAAdV-1 field strain 030415/1    | red fox     | liver         | 2015                    | UK            | KU755719                      |          |          |          |          |          |
| CAAdV-1 field strain 010515/5    | red fox     | kidney        | 2015                    | UK            | KU755720                      |          |          |          |          |          |
| CAAdV-1 field strain 17157       | red fox     | liver         | 2015                    | UK            | KU755721                      |          |          |          |          |          |
| CAAdV-1 field strain 17154       | red fox     | liver         | 2015                    | UK            | KU755722                      |          |          |          |          |          |
| CAAdV-1 field strain 15195       | red fox     | liver         | 2015                    | UK            | KU755723                      |          |          |          |          |          |
| CAAdV-1 field strain 17066       | red fox     | liver         | 2015                    | UK            | KU755724                      |          |          |          |          |          |
| CAAdV-1 field strain 15620       | red fox     | liver         | 2015                    | UK            | KU755725                      |          |          |          |          |          |
| CAAdV-1 field strain 16036       | red fox     | liver         | 2015                    | UK            | KU755726                      |          |          |          |          |          |
| CAAdV-1 field strain 15346       | red fox     | kidney        | 2015                    | UK            | KU755727                      |          |          |          |          |          |
| CAAdV-1 field strain 15622       | red fox     | kidney        | 2015                    | UK            | KU755728                      |          |          |          |          |          |
| CAAdV-1 field strain 16606       | red fox     | liver         | 2015                    | UK            | KU755729                      |          |          |          |          |          |
| CAAdV-1 field strain 13-0086     | dog         | liver         | 2013                    | AU            | KT853096                      |          |          |          |          |          |
| CAAdV-1 field strain 13-0067     | dog         | liver         | 2013                    | AU            | KT853097                      |          |          |          |          |          |
| CAAdV-1 field strain SD-1        | dog         | NA            | 2011                    | CN            | KJ451612                      |          |          |          |          |          |
| CAAdV-1 field strain CADRAD      | dog         | faeces        | 2015                    | IN            | KX181846                      |          |          |          |          |          |
| CAAdV-1 field strain PT/12       | dog         | liver         | 2012                    | PL            | KC577558                      |          |          |          |          |          |
| CAAdV-1 field strain ITL2015     | wolf        | liver         | 2015                    | IT            | KX545420                      |          |          |          |          |          |
| CAAdV-1 vaccine strain CLL       | NA          | NA            | 1996 <sup>b</sup>       | NA            | U55001                        |          |          |          |          |          |
| CAAdV-1 field strain RI261       | dog         | lung          | 1996 <sup>b</sup>       | UK            | Y07760 (NC_001734, AC_000003) |          |          |          |          |          |
| CAAdV-1 vaccine strain GLAXO     | NA          | NA            | 1991 <sup>b</sup>       | NA            | M60937                        |          |          |          |          |          |
| CAAdV-1 field strain 113-5L      | red fox     | liver         | 2011                    | IT            | JX416839                      |          |          |          |          |          |
|                                  |             |               |                         |               | KP840544                      |          |          |          |          |          |

|                                       |            |            |         |    |                                              |   |   |   |
|---------------------------------------|------------|------------|---------|----|----------------------------------------------|---|---|---|
| CAAdV-1 field strain 417-L            | dog        | liver      | 2013    | IT | KP840545<br>KP670423<br>KP840546<br>KP840547 |   |   |   |
| CAAdV-1 field strain 574-RS           | dog        | rs         | 2013    | IT | KP670424<br>KP840548<br>KP840549             |   |   |   |
| CAAdV-1 field strain 602-01-spleen    | red fox    | spleen     | 2007    | NO | MF344652                                     | ■ |   |   |
| CAAdV-1 field strain 602-02-spleen    | red fox    | spleen     | 2008    | NO | MF344653                                     |   |   |   |
| CAAdV-1 field strain 602-03-spleen    | red fox    | spleen     | 2008    | NO | MF344654                                     |   |   |   |
| CAAdV-1 field strain 602-04-spleen    | red fox    | spleen     | 2008    | NO | MF344655                                     |   |   |   |
| CAAdV-1 field strain 602-05-spleen    | red fox    | spleen     | 2008    | NO | MF344656                                     |   |   |   |
| CAAdV-1 field strain 602-06-spleen    | red fox    | spleen     | 2008    | NO | MF344657                                     |   |   |   |
| CAAdV-1 field strain 602-07-spleen    | red fox    | spleen     | 2008    | NO | MF344658                                     |   |   |   |
|                                       |            |            |         |    | MF344666                                     |   | ■ |   |
|                                       |            |            |         |    | MF344672                                     |   |   |   |
| CAAdV-1 field strain 603-05-lymphnode | arctic fox | lymph node | 2001/02 | NO | MF344659                                     | ■ |   |   |
| CAAdV-1 field strain 603-06-liver     | arctic fox | liver      | 1997/98 | NO | MF344660                                     |   |   |   |
|                                       |            |            |         |    | MF344667                                     |   | ■ |   |
|                                       |            |            |         |    | MF344673                                     |   |   |   |
| CAAdV-1 field strain 603-07-kidney    | arctic fox | kidney     | 1997/98 | NO | MF344661                                     | ■ |   |   |
|                                       |            |            |         |    | MF344668                                     |   |   | ■ |
|                                       |            |            |         |    | MF344674                                     |   |   |   |
| CAAdV-1 field strain 603-10-spleen    | arctic fox | spleen     | 1999/00 | NO | MF344662                                     | ■ |   |   |
|                                       |            |            |         |    | MF344669                                     |   |   | ■ |
|                                       |            |            |         |    | MF344675                                     |   |   |   |
| CAAdV-1 field strain 603-11-kidney    | arctic fox | kidney     | 2001/02 | NO | MF344663                                     | ■ |   |   |
| CAAdV-1 field strain 603-12-spleen    | arctic fox | spleen     | 2001/02 | NO | MF344664                                     |   |   | ■ |
|                                       |            |            |         |    | MF344670                                     |   |   |   |
|                                       |            |            |         |    | MF344676                                     |   | ■ |   |
| CAAdV-1 field strain 603-13-lymphnode | arctic fox | lymph node | 1999/00 | NO | MF344665                                     | ■ |   |   |
|                                       |            |            |         |    | MF344671                                     |   |   | ■ |
|                                       |            |            |         |    | MF344677                                     |   |   |   |
| CAAdV-1 field strain 874-2014-Tongue  | wolf       | tongue     | 2014    | IT | MH105809<br>MH105810                         |   |   |   |
| CAAdV-2 strain Manhattan              | dog        | NA         | 1992    | US | S38212                                       | ■ |   |   |
| CAAdV-2 field strain 60-OFS           | dog        | ops        | 2011    | IT | KF676978                                     |   |   |   |
| CAAdV-2 field strain 113-3F-c01       | red fox    | faeces     | 2011    | IT | JX416841                                     |   |   |   |
| CAAdV-2 field strain 113-3F-c04       | red fox    | faeces     | 2011    | IT | JX416842                                     |   |   |   |
| CAAdV-2 field strain 249-RS           | dog        | rs         | 2012    | IT | KF676981                                     |   |   |   |
| CAAdV-2 field strain 272-RS           | dog        | rs         | 2012    | IT | KF676982                                     |   |   |   |

|                                       |            |                  |             |           |                                |  |
|---------------------------------------|------------|------------------|-------------|-----------|--------------------------------|--|
| CAAdV-2 field strain S1-OFS           | dog        | ops              | 2011        | IT        | KF676979                       |  |
| CAAdV-2 field strain SV431/15         | dog        | NA               | 2015        | BR        | KU725671                       |  |
| CAAdV-2 field strain SV435/15         | dog        | NA               | 2015        | BR        | KU725672                       |  |
| CAAdV-2 field strain SV521/13         | dog        | NA               | 2013        | BR        | KU725673                       |  |
| CAAdV-2 field strain SV675/13         | dog        | NA               | 2013        | BR        | KU725674                       |  |
| CAAdV-2 field strain HB1              | dog        | rs               | 2009        | CN        | GQ915311                       |  |
| CAAdV-2 field strain 1.6              | dog        | ns               | 2014        | BR        | KU315333                       |  |
| CAAdV-2 field strain 1.11             | dog        | ns               | 2014        | BR        | KU315334                       |  |
| CAAdV-2 field strain 1.18             | dog        | ns               | 2014        | BR        | KU315335                       |  |
| CAAdV-2 field strain 3.55             | dog        | ns               | 2014        | BR        | KU315336                       |  |
| CAAdV-2 field strain 3.70             | dog        | ns               | 2014        | BR        | KU315337                       |  |
| CAAdV-2 strain Toronto A26/61         | dog        | NA               | 1961        | CA        | CAU77082 (BK000403, AC_000020) |  |
| CAAdV-2 field strain cc0710QZ         | dog        | NA               | 2007        | CN        | EU794687                       |  |
| CAAdV-2 field strain CC0710QB         | dog        | NA               | 2007        | CN        | EU717145                       |  |
| CAAdV-2 field strain                  | dog        | NA               | 2006        | IN        | DQ839392                       |  |
| CAAdV-2 field strain YCA-18           | dog        | NA               | 2007        | CN        | EF508034                       |  |
| CAAdV-2 field strain CC0710           | dog        | uterus           | 2009        | CN        | GQ241864                       |  |
| CAAdV-2 field strain SH01             | dog        | NA               | 2011        | CN        | KF727562                       |  |
| BtAdV-2 field strain PPV1             | bat        | liver/kidney     | 2007        | DE        | JN252129                       |  |
| <b>CAAdV-1 field strain 334/2012</b>  | <b>dog</b> | <b>faeces</b>    | <b>2012</b> | <b>IT</b> | <b>MT193158</b>                |  |
| <b>CAAdV-2 field strain 53/2011</b>   | <b>dog</b> | <b>intestine</b> | <b>2011</b> | <b>IT</b> | <b>MT193150</b>                |  |
|                                       |            |                  |             |           | <b>MT193142</b>                |  |
|                                       |            |                  |             |           | <b>MT193135</b>                |  |
| <b>CAAdV-2 field strain 55/2011</b>   | <b>dog</b> | <b>faeces</b>    | <b>2011</b> | <b>IT</b> | <b>MT193151</b>                |  |
|                                       |            |                  |             |           | <b>MT193143</b>                |  |
| <b>CAAdV-2 field strain 88/2011</b>   | <b>dog</b> | <b>faeces</b>    | <b>2011</b> | <b>IT</b> | <b>MT193152</b>                |  |
|                                       |            |                  |             |           | <b>MT193144</b>                |  |
|                                       |            |                  |             |           | <b>MT193136</b>                |  |
| <b>CAAdV-2 field strain 258/2006</b>  | <b>dog</b> | <b>faeces</b>    | <b>2006</b> | <b>IT</b> | <b>MT193153</b>                |  |
|                                       |            |                  |             |           | <b>MT193145</b>                |  |
|                                       |            |                  |             |           | <b>MT193137</b>                |  |
| <b>CAAdV-2 field strain 618/1995</b>  | <b>dog</b> | <b>faeces</b>    | <b>1995</b> | <b>IT</b> | <b>MT193154</b>                |  |
|                                       |            |                  |             |           | <b>MT193146</b>                |  |
|                                       |            |                  |             |           | <b>MT193138</b>                |  |
| <b>CAAdV-2 field strain 687/1999</b>  | <b>dog</b> | <b>faeces</b>    | <b>1999</b> | <b>IT</b> | <b>MT193155</b>                |  |
|                                       |            |                  |             |           | <b>MT193147</b>                |  |
|                                       |            |                  |             |           | <b>MT193139</b>                |  |
| <b>CAAdV-2 field strain 800/2009</b>  | <b>dog</b> | <b>faeces</b>    | <b>2009</b> | <b>IT</b> | <b>MT193156</b>                |  |
|                                       |            |                  |             |           | <b>MT193148</b>                |  |
|                                       |            |                  |             |           | <b>MT193140</b>                |  |
| <b>CAAdV-2 field strain 1149/2015</b> | <b>dog</b> | <b>intestine</b> | <b>2015</b> | <b>IT</b> | <b>MT193157</b>                |  |

<sup>a</sup> Year of virus identification or sequence submission to the GenBank database

<sup>b</sup> Year of submission to the GenBank database

CAdV-1, canine adenovirus type 1; CAdV-2, canine adenovirus type 2; BtAdV-2, bat adenovirus type 2; E, sequences used for partial E3 gene and flanking regions alignment and phylogenetic analysis; H, sequences used for hexon gene alignment; F, sequences used for fiber gene alignment; D, sequences used for entropy (H(x)) plot and DnaSP analysis; P, sequences used for phylogenetic analysis of concatenated hexon and fiber genes; iccf, infected cell culture fluid; ffpel, formalin-fixed paraffin-embedded liver; rs, rectal swab; ops, oro-pharyngeal swab; ns, nasal swab. In bold: CAdV nucleotide sequences obtained in this study.
