# Supplementary material for: Canine circovirus and Canine adenovirus type 1 and 2 in dogs with parvoviral enteritis
Source: Springer Nature journal article supplement (doi:10.1007/s11259-021-09850-y), 2021-10-20

**Canine circovirus and Canine adenovirus type 1 and 2 in dogs with parvoviral enteritis**

Andrea Balboni, Alessia Terrusi, Lorenza Urbani, Roberta Troia, Silvia A M Stefanelli, Massimo Giunti, Mara Battilani\*.

\* Corresponding author:

Mara Battilani

Department of Veterinary Medical Sciences, *Alma Mater Studiorum* – University of Bologna, Ozzano dell'Emilia (BO),  
Italy

*E-mail address:* [mara.battilani@unibo.it](mailto:mara.battilani@unibo.it)

**Online Resource 3a** Graphical representation of the replicase (Rep) gene nucleotide sequence entropy obtained with the entropy ( $H(x)$ ) plot function implemented in BioEdit. The plot shows the variability of the different nucleotide residues in the Rep gene alignment. The analysis was performed on the CanineCV nucleotide sequences generated in this study and on CanineCV reference strains which had available both Rep and capsid (Cap) genes sequences

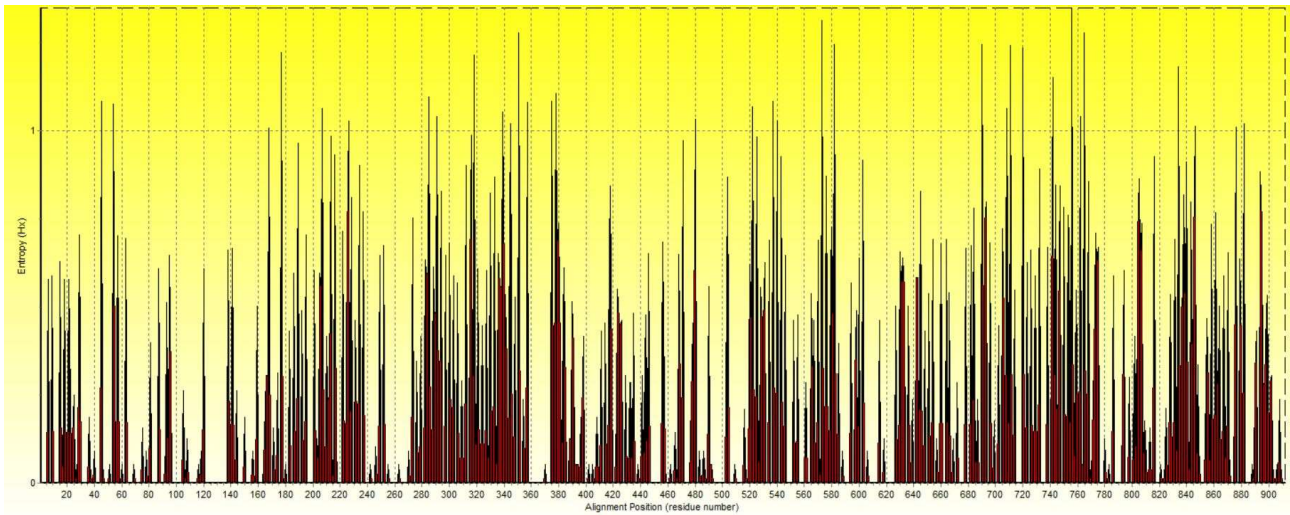

**Online Resource 3b** Graphical representation of the capsid (Cap) gene nucleotide sequence entropy obtained with the entropy ( $H(x)$ ) plot function implemented in BioEdit. The plot shows the variability of the different nucleotide residues in the Cap gene alignment. The analysis was performed on the CanineCV nucleotide sequences generated in this study and on CanineCV reference strains which had available both replicase (Rep) and Cap genes sequences

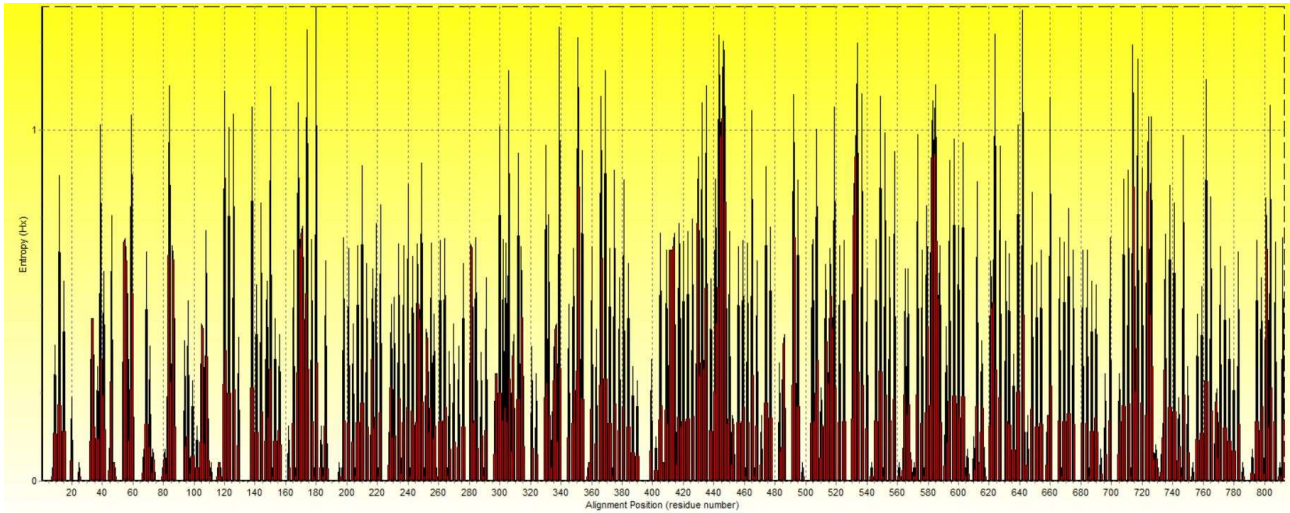

Supplement: MOESM3 [file 11259_2021_9850_MOESM3_ESM.pdf]
