# Supplementary material for: Canine circovirus and Canine adenovirus type 1 and 2 in dogs with parvoviral enteritis
Source: Springer Nature journal article supplement (doi:10.1007/s11259-021-09850-y), 2021-10-20

## **Veterinary Research Communications**

### **Canine circovirus and Canine adenovirus type 1 and 2 in dogs with parvoviral enteritis**

Andrea Balboni, Alessia Terrusi, Lorenza Urbani, Roberta Troia, Silvia A M Stefanelli, Massimo Giunti, Mara Battilani\*.

\* Corresponding author:

Mara Battilani

Department of Veterinary Medical Sciences, *Alma Mater Studiorum* – University of Bologna, Ozzano dell'Emilia (BO),

Italy

*E-mail address:* [mara.battilani@unibo.it](mailto:mara.battilani@unibo.it)

**Online Resource 5a** Graphical representation of the hexon gene nucleotide sequence entropy obtained with the entropy ( $H(x)$ ) plot function implemented in BioEdit. The plot shows the variability of the different nucleotide residues in the hexon gene alignment. The analysis was performed on the CAdV-2 nucleotide sequences generated in this study and on CAdV-2 reference strains which had available both hexon and fiber genes sequences (**Online Resource 2**)

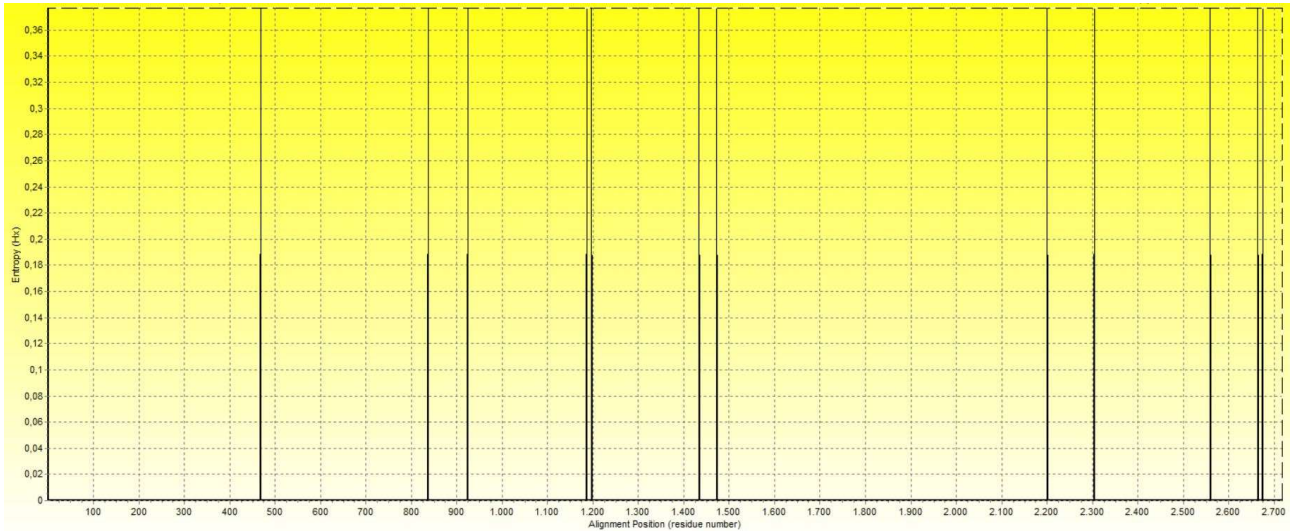

**Online Resource 5b** Graphical representation of the fiber gene nucleotide sequence entropy obtained with the entropy ( $H(x)$ ) plot function implemented in BioEdit. The plot shows the variability of the different nucleotide residues in the fiber gene alignment. The analysis was performed on the CA $\Delta$ V-2 nucleotide sequences generated in this study and on CA $\Delta$ V-2 reference strains which had available both hexon and fiber genes sequences (**Online Resource 2**)

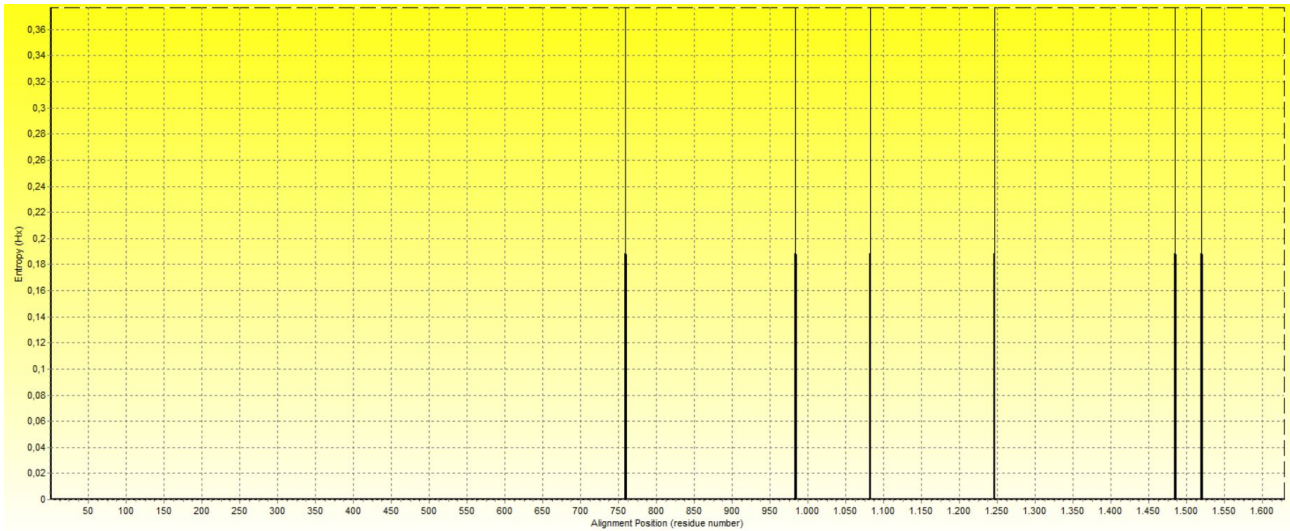

Supplement: MOESM5 [file 11259_2021_9850_MOESM5_ESM.pdf]
